# Supplementary material for: Low-phospholipid-associated cholelithiasis syndrome: Prevalence, clinical features, and comorbidities
Source: PubMed Central journal article supplement — JHEP Rep. 2020 Nov 6;3(2):100201. doi: 10.1016/j.jhepr.2020.100201 (PMC7848766; doi:10.1016/j.jhepr.2020.100201), 2020-11-06
Supplement: mmc1.pdf [file mmc1.pdf]

**Low-phospholipid-associated cholelithiasis syndrome:  
Prevalence, clinical features, and comorbidities**

Catherine Dong, Bertrand Condat, Magalie Picon-Coste, Yves Chretien, Pascal Potier, Béatrice Noblinski, Lionel Arrivé, Marie-Pierre Hauuy, Véronique Barbu, Anware Maftouh, Farid Gaouar, Karima Ben Belkacem, Chantal Housset, Raoul Poupon, David Zandite-s, Olivier Chazouilleres, Christophe Corpechot

Table of contents

|               |   |
|---------------|---|
| Table S1..... | 2 |
| Table S2..... | 3 |

**Table S1.** Multiple regression analysis of clinical features associated with LPAC diagnosis when evidence for common bile duct lithiasis was limited to imaging features.

| Clinical features                                         | FDR LogWorth (95% confidence interval) |                                             |                                                                      |
|-----------------------------------------------------------|----------------------------------------|---------------------------------------------|----------------------------------------------------------------------|
|                                                           | All cases (n=308)                      | Cases with typical imaging features (n=272) | Cases with typical imaging features and <i>ABCB4</i> variant (n=106) |
| Imaging evidence of intrahepatic micro or macro-lithiasis | 55.0 (54.1 – 55.8)                     | –                                           | –                                                                    |
| Recurrence of symptoms after cholecystectomy              | 15.7 (15.2 – 16.3)                     | 27.5 (26.6 – 28.5)                          | 11.8 (11.1 – 12.4)                                                   |
| Age at first symptoms before 40                           | 2.5 (2.3 – 2.8)                        | 15.9 (15.3 – 16.6)                          | 10.8 (10.3 – 11.3)                                                   |
| Imaging evidence of CBD lithiasis                         | 3.4 (3.1 – 3.6)                        | 5.4 (5.0 – 5.8)                             | 3.5 (3.2 – 3.8)                                                      |
| No history of obesity or overweight                       | NS                                     | 6.0 (5.5 – 6.4)                             | 4.5 (4.1 – 4.9)                                                      |
| No history of acute cholecystitis                         | 1.7 (1.5 – 1.9)                        | 8.3 (7.8 – 8.7)                             | 4.3 (3.9 – 4.6)                                                      |

FDR: false discovery rate. CBD: common bile duct. NS: not significant at the 0.05 level. The FDR LogWorth is a quantitative measure of how strong is the association between diagnosis and clinical features in multiple logistic regression analysis. It is defined as  $-\log_{10}(\text{FDR p-value})$ . A value that exceeds 2 is significant at the 0.01 level.

**Table S2.** Non-exhaustive list of the main *ABCB4* variants observed in the LPAC cases of this study.

| Variant      | Location | Allele Frequency (GnomAD 2.1) | Amino-acid change | Nature of variation | Status | Mutpred2 score | Mutation taster | Reference | Predicted consequences | Number of times found |
|--------------|----------|-------------------------------|-------------------|---------------------|--------|----------------|-----------------|-----------|------------------------|-----------------------|
| 79A>G        | Exon 2   | NA                            | Ser27Gly          | Missense            | HTZ    | 0.065          |                 | [1]       | Pathogenic             | 1                     |
| 101C>T       | Exon 3   | 0.053%                        | Thr34Met          | Missense            | HTZ    | 0.023          | Polymorphism    | [2]       | VUS                    | 1                     |
| 139C>T       | Exon 4   | NA                            | Arg47*            | Nonsense            | HTZ    | -              |                 |           | Pathogenic             | 1                     |
| 140G>A       | Exon 4   | 0.0088%                       | Arg47Gln          | Missense            | HTZ    | 0.545          |                 | [3]       | VUS                    | 4                     |
| 202G>A       | Exon 4   | 0.00040%                      | Gly68Arg          | Missense            | HTZ    | 0.840          |                 |           | Pathogenic             | 1                     |
| 217C>G       | Exon 4   | 0.073%                        | Leu73Val          | Missense            | HTZ    | 0.302          | Disease causing | [4]       | Pathogenic             | 1                     |
| 344G>T       | Exon 5   | NA                            | Arg115Ile         | Missense            | HTZ    | -              |                 |           | VUS                    | 1                     |
| 475C>T       | Exon 6   | 0.0018%                       | Arg159*           | Nonsense            | HTZ    | 0.340          |                 |           | Pathogenic             | 2                     |
| 523A>G       | Exon 6   | 1.15%                         | Thr175Ala         | Missense            | HTZ    | 0.383          | Disease causing | [5, 6]    | Conflicting            | 3                     |
| 524C>T       | Exon 6   | 0.023%                        | Thr175Met         | Missense            | HTZ    | 0.340          | Disease causing | [7]       | VUS                    | 1                     |
| 578G>A       | Exon 7   | NA                            | Gly193Glu         | Missense            | HTZ    | 0.695          |                 |           | VUS                    | 1                     |
| 609dup       | Exon 7   | NA                            | Ala204Cysfs*39    | Frameshift          | HTZ    | -              |                 |           | Pathogenic             | 1                     |
| 959C>T       | Exon 9   | 0.016%                        | Ser320Phe         | Missense            | HTZ    | 0.830          |                 |           | Pathogenic             | 2                     |
| 1015dup      | Exon 10  | 0.075%                        | Ser339Phefs*17    | Frameshift          | HTZ    | -              |                 |           | Pathogenic             | 1                     |
| 1130T>C      | Exon 11  | 0.00040%                      | Ile377Thr         | Missense            | HTZ    | 0.669          |                 |           | VUS                    | 1                     |
| 1217G>A      | Exon 11  | 0.00080%                      | Arg406Gln         | Missense            | HTZ    | 0.468          | Disease causing | [8]       | VUS                    | 1                     |
| 1295_1301del | Exon 12  | NA                            | Cys433Argfs*7     | Frameshift          | HTZ    | -              |                 |           | Pathogenic             | 1                     |
| 1327C>G      | Exon 12  | NA                            | Gln443Glu         | Missense            | HTZ    | 0.701          |                 |           | VUS                    | 1                     |
| 1420delG     | Exon 13  | NA                            | Val474Trpfs*2     | Frameshift          | HTZ    | -              |                 |           | Pathogenic             | 1                     |
| 1553delT     | Exon 13  | NA                            | Leu518Tyrfs*16    | Frameshift          | HTZ    | -              |                 |           | Pathogenic             | 1                     |
| 1576G>T      | Exon 14  | NA                            | Val526Phe         | Missense            | HTZ    | 0.838          |                 |           | VUS                    | 1                     |
| 1633C>T      | Exon 14  | 0.00080%                      | Arg545Cys         | Missense            | HTZ    | 0.903          |                 |           | Pathogenic             | 1                     |
| 1646G>A      | Exon 14  | 0.0036%                       | Arg549His         | Missense            | HTZ    | 0.406          | Disease causing | [9]       | Pathogenic             | 1                     |
| 1675C>A      | Exon 14  | NA                            | Ala559Thr         | Missense            | HTZ    | 0.826          |                 |           | VUS                    | 1                     |
| 1712del      | Exon 14  | NA                            | Val571Aspfs*16    | Frameshift          | HTZ    | -              |                 |           | Pathogenic             | 1                     |
| 1744C>T      | Exon 15  | 0.0032%                       | Arg582Trp         | Missense            | HTZ    | 0.761          |                 |           | VUS                    | 1                     |
| 1769G>A      | Exon 15  | 0.45%                         | Arg590Gln         | Missense            | HTZ    | 0.885          |                 |           | Pathogenic             | 4                     |
| 1772T>A      | Exon 15  | 0.00040%                      | Leu591Gln         | Missense            | HMZ    | 0.938          |                 |           | Pathogenic             | 1                     |
| 1973G>A      | Exon 16  | NA                            | Trp658*           | Nonsense            | HTZ    | -              |                 |           | Pathogenic             | 1                     |
| 1981C>T      | Exon 16  | 0.0014%                       | Arg661Cys         | Missense            | HTZ    | 0.063          | Polymorphism    |           | VUS                    | 1                     |

|                |           |          |                 |            |     |       |                 |      |            |   |
|----------------|-----------|----------|-----------------|------------|-----|-------|-----------------|------|------------|---|
| 2078delC       | Exon 17   | 0.00040% | Pro693Hisfs*6   | Frameshift | HTZ | -     |                 |      | Pathogenic | 1 |
| 2363G>A        | Exon 19   | 0.82%    | Arg788Gln       | Missense   | HTZ | 0.779 |                 |      | VUS        | 1 |
| 2363G>A        | Exon 19   | 0.82%    | Arg788Gln       | Missense   | HMZ | 0.779 |                 |      | VUS        | 1 |
| 2406G>A        | Exon 20   | NA       | Trp802*         | Nonsense   | HTZ | -     |                 |      | Pathogenic | 2 |
| 2661dup        | Exon 21   | NA       | Glu888Argfs*17  | Frameshift | HTZ | -     |                 |      | Pathogenic | 1 |
| 2800G>A        | Exon 23   | 0.12%    | Ala934Thr       | Missense   | HTZ | 0.567 |                 |      | VUS        | 4 |
| 2869C>T        | Exon 23   | NA       | Arg957*         | Nonsense   | HTZ | -     |                 |      | Pathogenic | 1 |
| 2953G>T        | Exon 24   | 0.00040% | Val985Leu       | Missense   | HTZ | 0.184 | Disease causing | [10] | VUS        | 1 |
| 3279+1G>A      | Intron 25 | 0.00040% | N/A             | Splice     | HTZ | -     |                 |      | VUS        | 1 |
| 3511_3512delAA | Exon 27   | 0.00040% | Lys1171Glyfs*29 | Frameshift | HTZ | -     |                 |      | Pathogenic | 1 |
| 3828T>C        | Exon 28   | NA       | *1280Arg ext*20 | No-stop    | HTZ | -     |                 |      | VUS        | 1 |

NA, not available. N/A, non-applicable. HTZ, heterozygous. HMZ, homozygous. VUS, variant of uncertain significance. Mutpred2 score > 0.5: likely pathogenic or pathogenic. Mutation taster and/or reference suggesting pathogenicity: only given when Mutpred2 score < 0.5. Note: in total, *ABCB4* gene variants were detected in 122 (45%) of the 269 LPAC patients with a genotyping test available (87% of the whole cohort).

- [1] Jacquemin E, De Vree JM, Cresteil D, Sokal EM, Sturm E, Dumont M, et al. The wide spectrum of multidrug resistance 3 deficiency: from neonatal cholestasis to cirrhosis of adulthood. *Gastroenterology* 2001;120:1448-1458.
- [2] Gautherot J, Delautier D, Maubert MA, Ait-Slimane T, Bolbach G, Delaunay JL, et al. Phosphorylation of *ABCB4* impacts its function: insights from disease-causing mutations. *Hepatology* 2014;60:610-621.
- [3] Davit-Spraul A, Gonzales E, Baussan C, Jacquemin E. The spectrum of liver diseases related to *ABCB4* gene mutations: pathophysiology and clinical aspects. *Semin Liver Dis* 2010;30:134-146.
- [4] Colombo C, Vajro P, Degiorgio D, Coviello DA, Costantino L, Tornillo L, et al. Clinical features and genotype-phenotype correlations in children with progressive familial intrahepatic cholestasis type 3 related to *ABCB4* mutations. *J Pediatr Gastroenterol Nutr* 2011;52:73-83.
- [5] Rosmorduc O, Hermelin B, Boelle PY, Parc R, Taboury J, Poupon R. *ABCB4* gene mutation-associated cholelithiasis in adults. *Gastroenterology* 2003;125:452-459.
- [6] Delaunay JL, Durand-Schneider AM, Dossier C, Falguières T, Gautherot J, Davit-Spraul A, et al. A functional classification of *ABCB4* variations causing progressive familial intrahepatic cholestasis type 3. *Hepatology* 2016;63:1620-1631.
- [7] de Vree JM, Jacquemin E, Sturm E, Cresteil D, Bosma PJ, Aten J, et al. Mutations in the *MDR3* gene cause progressive familial intrahepatic cholestasis. *Proc Natl Acad Sci U S A* 1998;95:282-287.
- [8] Poupon R, Arrive L, Rosmorduc O. The cholangiographic features of severe forms of *ABCB4/MDR3* deficiency-associated cholangiopathy in adults. *Gastroenterol Clin Biol* 2010;34:380-387.
- [9] Floreani A, Carderi I, Paternoster D, Soardo G, Azzaroli F, Esposito W, et al. Hepatobiliary phospholipid transporter *ABCB4*, *MDR3* gene variants in a large cohort of Italian women with intrahepatic cholestasis of pregnancy. *Dig Liver Dis* 2008;40:366-370.
- [10] Olsen JA, Alam A, Kowal J, Stieger B, Locher KP. Structure of the human lipid exporter *ABCB4* in a lipid environment. *Nat Struct Mol Biol* 2020;27:62-70.
