# Supplementary material for: Low-phospholipid-associated cholelithiasis syndrome: Prevalence, clinical features, and comorbidities
Source: PubMed Central journal article supplement — JHEP Rep. 2020 Nov 6;3(2):100201. doi: 10.1016/j.jhepr.2020.100201 (PMC7848766; doi:10.1016/j.jhepr.2020.100201), 2020-11-06
Supplement: mmc2.pdf [file mmc2.pdf]

## JHEP Reports

### CTAT methods

Tables for a “Complete, Transparent, Accurate and Timely account” (CTAT) are now mandatory for all revised submissions. The aim is to enhance the reproducibility of methods.

- Only include the parts relevant to your study
- Refer to the CTAT in the main text as ‘Supplementary CTAT Table’
- Do not add subheadings
- Add as many rows as needed to include all information
- Only include one item per row

**If the CTAT form is not relevant to your study, please outline the reasons why:**

|                                                    |
|----------------------------------------------------|
| Retrospective study design of routine patient data |
|----------------------------------------------------|

#### 1.1 Antibodies

| Name | Citation | Supplier | Cat no. | Clone no. |
|------|----------|----------|---------|-----------|
| N/A  |          |          |         |           |

#### 1.2 Cell lines

| Name | Citation | Supplier | Cat no. | Passage no. | Authentication test method |
|------|----------|----------|---------|-------------|----------------------------|
| N/A  |          |          |         |             |                            |

#### 1.3 Organisms

| Name | Citation | Supplier | Strain | Sex | Age | Overall n number |
|------|----------|----------|--------|-----|-----|------------------|
| N/A  |          |          |        |     |     |                  |

#### 1.4 Sequence based reagents

| Name | Sequence | Supplier |
|------|----------|----------|
| N/A  |          |          |

#### 1.5 Biological samples

| Description | Source | Identifier |
|-------------|--------|------------|
| N/A         |        |            |

#### 1.6 Deposited data

| Name of repository | Identifier | Link |
|--------------------|------------|------|
| N/A                |            |      |

## 1.7 Software

| Software name | Manufacturer | Version |
|---------------|--------------|---------|
| JMP Pro       | JMP inc.     | 12.1    |

## 1.8 Other (e.g. drugs, proteins, vectors etc.)

|     |  |  |
|-----|--|--|
| N/A |  |  |
|     |  |  |

## 1.9 Please provide the details of the corresponding methods author for the manuscript:

Christophe Corpechot, Saint-Antoine Hospital, APHP, Sorbonne University, 184 rue du faubourg Saint-Antoine, 75571 Paris, cedex 12, France. Phone : +33 1 49 28 28 36. Fax : +33 1 49 28 21 07. Email : christophe.corpechot@aphp.fr.

## 2.0 Please confirm for randomised controlled trials all versions of the clinical protocol are included in the submission. These will be published online as supplementary information.

N/A
